# Supplementary material for: Human Cytomegalovirus and Human Herpesvirus 6 Coinfection of Dermal Fibroblasts Enhances the Pro-Inflammatory Pathway Predisposing to Fibrosis: The Possible Impact on Systemic Sclerosis
Source: MDPI journal article supplement (doi:10.3390/microorganisms10081600), 2022-08-08
Supplement: s1 [file s1]

Table S1. Fold-change values of fibrosis-associated factors after single or double infection with HCMV and HHV-6A.

| Factor  | Fold-change expression of analyzed factors (*) |        |                 |          |        |                 |          |        |                 |          |        |                 |          |        |                 |        |           |                 |
|---------|------------------------------------------------|--------|-----------------|----------|--------|-----------------|----------|--------|-----------------|----------|--------|-----------------|----------|--------|-----------------|--------|-----------|-----------------|
|         | 0 d.p.i.                                       |        |                 | 1 d.p.i. |        |                 | 2 d.p.i. |        |                 | 4 d.p.i. |        |                 | 7 d.p.i. |        |                 |        | 10 d.p.i. |                 |
|         | HCMV                                           | HHV-6A | HCMV/<br>HHV-6A | HCMV     | HHV-6A | HCMV/<br>HHV-6A | HCMV     | HHV-6A | HCMV/<br>HHV-6A | HCMV     | HHV-6A | HCMV/<br>HHV-6A | HCMV     | HHV-6A | HCMV/<br>HHV-6A | HCMV   | HHV-6A    | HCMV/<br>HHV-6A |
| ACTA2   | 1.55                                           | -1.12  | -1.02           | -1.07    | -1.05  | 1.11            | -1.24    | -1.12  | -1.35           | 1.64     | -2.07  | -1.5            | 2.48     | -1.64  | -5.11           | 2.19   | 1.02      | -8.6            |
| AGT     | 1.25                                           | -2.94  | -1.53           | 1.02     | 1.37   | 4.15            | 1.09     | -1.04  | 1.29            | -2.14    | 2.33   | 2.16            | -2.1     | -1.74  | 1.65            | 2.15   | 1.15      | 2.41            |
| AKT1    | -1.19                                          | -1.12  | 1               | 1.21     | 1.18   | 1.47            | 1.18     | -1.01  | 1.11            | -1.8     | 1.17   | 1.11            | 1.09     | -1.34  | 1.21            | 2.22   | -1.14     | 1.12            |
| BCL2    | 1.42                                           | -1.08  | -1.2            | 1.11     | 1.25   | 1.89            | -1.31    | -1.36  | -1.37           | -2.34    | 1.2    | 1.15            | 1.26     | 1.11   | -12.28          | -1.23  | 1.01      | -1.36           |
| BMP7    | 2.44                                           | 2.3    | -11.94          | 2.12     | 2.25   | 3.61            | 2.36     | 2.94   | 3.85            | 3.65     | 4.19   | 53.91           | 5.07     | 9.38   | 308.39          | 134.1  | 13.68     | 823.2           |
| CAV1    | -1.08                                          | 1.06   | -1.01           | -1.19    | -1.01  | -1.53           | -1.12    | 1.05   | -1.1            | 1.24     | -1.58  | -1.68           | -1.05    | 1.37   | -4.64           | -3.05  | -1.36     | -7.12           |
| CCL11   | 2.9                                            | -1     | -1.14           | 1.81     | -1.23  | 3.9             | 1.82     | 2.11   | 2.36            | 3.1      | -2.6   | 1.2             | 1.66     | -2.13  | -1.63           | 2.92   | -1.2      | -4.12           |
| CCL2    | 2.08                                           | 1.27   | 1.55            | 2.13     | -1.5   | 9.94            | 1.3      | -1.22  | 1.2             | 3.13     | 1.09   | 14.08           | 3.1      | 1.86   | 8.02            | 2.29   | 2.42      | -5.47           |
| CCL3    | 1.18                                           | -1.08  | -2.56           | 2.46     | 1.04   | 1.32            | 3.42     | -1.13  | 1.97            | 3.96     | -3.7   | 1.19            | -1.05    | -8.28  | 104.94          | 4.74   | -6.96     | 36.71           |
| CCR2    | 1.06                                           | 1.71   | -3.78           | 2.09     | 2.02   | 1.79            | 2.96     | 2.64   | 3.46            | 2.4      | 1.26   | 1.05            | -1.09    | -2.25  | -6.27           | 1.67   | 1.31      | -4.08           |
| CEBPB   | 1.09                                           | 1.22   | 1.4             | -1.27    | 1.1    | 1.86            | -1.15    | 1.54   | 1.02            | -1.25    | 1.07   | 1.04            | 2.85     | -1.72  | -1.03           | 2.56   | -1.18     | 1.1             |
| COL1A2  | 1.47                                           | -1.38  | 1.26            | -1.63    | 1.48   | 1.02            | -1.96    | 1.16   | -1.63           | 1.2      | -1.21  | -1.38           | 1.21     | -1.26  | -16.67          | -3.45  | 1.01      | -47.25          |
| COL3A1  | -1.28                                          | -1.24  | -1.06           | -1.86    | 1.12   | -1.26           | -1.51    | 1.08   | -1.47           | 1.99     | 1.12   | -1.64           | 2.22     | 1.5    | -29.4           | -3.7   | 1.53      | -113.98         |
| CCN2    | -1.11                                          | -1.2   | 1.22            | 1.22     | 1.03   | 1.05            | 1.19     | -1.3   | -1.22           | -2.42    | -1     | -1.05           | 2.36     | 1.07   | 1.12            | 2.34   | 1.62      | -1.07           |
| CXCR4   | -1.59                                          | 11.12  | 19.13           | 11.4     | 1.04   | 23.85           | 6.58     | 1.6    | 10.1            | 15.82    | 21.04  | 127.75          | 18.89    | 11.29  | 482.93          | 123.08 | 6.19      | 1217            |
| DCN     | -1.12                                          | -1.2   | 1.02            | -1.64    | 1.33   | 1.62            | -1.75    | 1.13   | -1.91           | -2.51    | 2.01   | -1.85           | -2.18    | 2.04   | -4.3            | -10.9  | 2.77      | -78.5           |
| EDN1    | 1.37                                           | 1.29   | 1.53            | -1.08    | -1.02  | 1.25            | -1.14    | -1.06  | -1.35           | -2.33    | -2.04  | -2.21           | -1.34    | -1.78  | -2.58           | -1.91  | -1.41     | -1.31           |
| EGF     | 1.02                                           | -2.09  | -7.59           | 1.63     | 1.36   | 3.04            | -1.04    | -1.89  | 1.07            | 2.12     | -1.71  | 1.73            | 1.06     | 1.06   | -1.81           | 1.4    | 1.15      | -2.02           |
| ENG     | 1.18                                           | -1.27  | 1.07            | -1.01    | 1.2    | 1.47            | -1.09    | 1.09   | -1.06           | 2.12     | 1.02   | 1.39            | 2.31     | -1.17  | 1.55            | 2.2    | -1.17     | -1.04           |
| FASLG   | 1.15                                           | 1.14   | -9.49           | 2.46     | 2.05   | 3.2             | -1.4     | -1.18  | -1.2            | 2.48     | 1.18   | 2.27            | 1.58     | 1.38   | -2.04           | 2.77   | 1.65      | -11.61          |
| GREM1   | -1.07                                          | -1.07  | 1.06            | -1.03    | 1.32   | 2.2             | -1.22    | 1.05   | -1.22           | 2.24     | 1.03   | 1.13            | 2.89     | -1.18  | 1.18            | -1.2   | -1.24     | -3.6            |
| HGF     | -1.11                                          | -1.08  | -1.09           | -1.41    | 1.4    | 1.15            | -1.53    | -1.09  | -1.56           | 3.59     | 1.57   | -3.66           | 4.34     | 2.92   | -16.54          | -1.6   | 2.99      | -610.49         |
| IFNG    | -4.99                                          | -1.95  | -7.96           | 2.8      | 2.95   | 1.74            | -1.62    | -1.95  | 1.19            | 2.27     | 1.18   | 1.58            | 1.32     | 1.38   | 1.05            | 2.38   | 1.65      | -3.32           |
| IL10    | -1                                             | 1.14   | 1.04            | 1.35     | -2.33  | 1.59            | -1.44    | -1.81  | -1.41           | -1.15    | 1.18   | -1.28           | 2.55     | 2.62   | -1.49           | 13.64  | 1.65      | -1.07           |
| IL13    | 1.33                                           | -1.39  | -9.55           | 1.01     | 1.16   | 1.51            | -1.35    | -1.43  | 1.06            | 2.39     | -1.92  | 1.01            | 2.22     | -2.33  | -2.35           | 9.61   | 1.09      | -1.4            |
| IL13RA2 | -1.14                                          | -1.1   | -1.13           | -1.19    | 1.02   | -1.42           | -1.49    | -1.05  | -1.43           | -3.42    | -1.03  | -1.31           | -5.57    | 1.89   | -6.16           | -8.44  | 1.6       | -31.48          |
| IL1A    | 1.96                                           | 1.35   | -1.51           | 1.3      | 1.4    | -1.46           | 1.32     | -1.63  | -2.1            | 1.51     | -3.12  | 3.63            | 1.5      | -1.31  | 1.38            | 2.86   | -1.22     | 1.25            |
| IL1B    | 3.36                                           | -1.07  | -5.12           | 2.69     | 2.93   | 2.96            | 3.68     | -1.69  | 1.4             | 4.08     | 4.56   | 1.23            | 4.04     | 3.88   | 7.73            | 2.37   | 3.05      | 2.19            |

|          |       |       |       |       |       |       |       |       |       |       |       |       |       |       |        |       |       |        |
|----------|-------|-------|-------|-------|-------|-------|-------|-------|-------|-------|-------|-------|-------|-------|--------|-------|-------|--------|
| IL4      | 2.02  | -1.68 | -3.26 | -1.94 | 2.94  | -2.1  | 1.41  | -1.15 | -1.93 | 1.81  | 1.18  | 1.97  | 6.58  | 8.34  | -7.79  | 3.14  | 7.36  | -2.41  |
| IL5      | 1.66  | 1.19  | -9.63 | 2.74  | 1.22  | 2.85  | 3.54  | -2.59 | 3     | 2.49  | -1.89 | -2.88 | 2.07  | 1.65  | -3.75  | -1.43 | 1.41  | 3.53   |
| ILK      | -1.05 | 1.08  | 1.02  | -1.04 | -1.04 | -1.15 | -1.03 | -1.02 | 1.03  | 1.03  | -1.03 | -1.01 | 1.39  | -1.03 | 1.29   | 1.95  | -1.33 | 1.62   |
| INHBE    | 1.02  | -2.4  | -6.58 | -1.42 | 1.2   | 18.62 | -1.28 | -1.28 | -1.28 | 6.93  | 1.18  | 26.26 | 1.12  | -2.23 | 373.75 | 2.87  | -1.92 | 35.52  |
| ITGA1    | -1.18 | 1.25  | 1.1   | 1.36  | 1.15  | 2.05  | 1.25  | 1.03  | 1.41  | 2.03  | 1.05  | 1.32  | 2.85  | 2.56  | 1.34   | 2.11  | 2.39  | 1.17   |
| ITGA2    | -1.23 | -1.16 | 1.02  | 2     | 1.08  | 3.25  | 1.65  | 1.07  | 1.61  | 1.72  | 1.5   | 1.12  | 2.51  | 2.09  | 2.13   | 1.52  | 1.36  | 1.46   |
| ITGA3    | 1.09  | 1.04  | 1.14  | 2.03  | 1.26  | 2.54  | 1.51  | -1.06 | 1.82  | 2.09  | -2.21 | 2.83  | 1.09  | -2.97 | 6.55   | 3.74  | -3.36 | 8.53   |
| ITGAV    | -1.08 | 1.01  | 1.06  | -1.2  | 1.13  | 1.41  | -1.33 | 1.19  | -1.45 | -2.04 | 1.42  | -1.32 | 1.15  | 1.82  | -2.9   | -2.32 | 1.82  | -4.44  |
| ITGB1    | -1.14 | -1.02 | 1.13  | -1.09 | 1.11  | 1.37  | -1.39 | 1.02  | -1.1  | -1.05 | 1.06  | -1.42 | 1.26  | 2.08  | -2.49  | -2.7  | 1.21  | -3.35  |
| ITGB3    | -1.14 | -1.12 | -1.04 | -1.15 | 1.19  | 1.12  | -1.16 | -1.02 | 1.06  | 2.7   | -1.61 | 1.04  | 2.09  | -1.11 | -1.82  | 1.35  | -1.26 | -2.39  |
| ITGB5    | -1.22 | -1.05 | 1.1   | -1.15 | 1.11  | 1.2   | -1.28 | 1.13  | -1.16 | -2.1  | 1.49  | -1.05 | 2.6   | -1.54 | -1.85  | 2.64  | -1.38 | -2.16  |
| ITGB6    | 1.11  | -1.16 | -5.34 | 1.28  | 1.26  | 1.51  | -1.88 | -1.56 | -1.46 | 2     | 2.52  | 1.07  | 1.37  | 1.38  | -1.4   | -1.62 | 1.67  | 1.39   |
| ITGB8    | -1.13 | -1.19 | -1.21 | 1.13  | 1.07  | 2.26  | 1.05  | -1.11 | 1.13  | -2.63 | 2.08  | 1.31  | -1.35 | 2.94  | 1.51   | -2.68 | 2.29  | -1.83  |
| JUN      | -1.05 | 1.17  | 1.26  | 1.08  | 1.27  | 1.12  | -1.22 | 1.01  | -1.26 | 1.27  | 1.6   | -1.41 | 2.25  | -1.29 | -2     | -1.5  | -1.59 | -2.11  |
| LOX      | -1.22 | -1.09 | 1.03  | -1.24 | -1.02 | 1.1   | -1.07 | 1.06  | -1.02 | -2.28 | -1.23 | -1.36 | -1.2  | 1.48  | -3.8   | -5.3  | 1.26  | -28.44 |
| LTBP1    | -1.15 | -1.08 | -1.11 | -1.14 | 1.03  | -1.08 | -1.42 | 1.06  | -1.33 | 3.16  | -1.21 | -1.33 | 2.55  | 2.12  | -2.2   | 1.44  | 1.38  | -5.41  |
| MMP1     | -1.24 | 1.05  | 1.01  | 1.33  | 1.25  | 1.69  | -1.14 | -1.04 | 1.12  | 3.51  | 1.09  | 2.08  | 1.39  | 2.51  | 5.65   | -2.11 | -1.09 | -1.46  |
| MMP13    | -1.05 | -1.89 | 1.54  | 3.6   | 1.04  | 4.16  | 1.11  | -1.13 | 7.51  | 2.51  | 1.18  | -1.28 | 2.44  | 1.38  | 4.02   | 2.13  | 1.65  | 1.34   |
| MMP14    | -1.44 | -1.33 | 1     | 1.04  | 1.36  | 1.82  | -1.39 | 1.31  | 1.03  | -1.85 | 2.03  | 1.17  | 2.93  | -1.19 | -1.56  | -1.34 | 1.29  | -6.43  |
| MMP2     | -1.11 | -1.39 | 1.35  | 1.04  | 1.71  | 2.71  | -1.52 | 1.05  | -1.18 | -1.38 | 1.52  | 1.36  | 1.8   | 1.01  | -1.07  | -1.77 | 1.3   | -11.31 |
| MMP3     | -1.29 | 1.02  | 1.16  | 1.07  | -1.04 | 1.2   | -1.01 | -1.18 | 1.06  | 2.7   | -1.44 | 1.18  | 2.39  | 1.75  | 1.03   | -2.3  | -2.74 | -3.53  |
| MMP8     | -1.09 | -1.32 | -5.59 | 1.54  | 1.31  | 2.15  | -1.4  | -1.49 | -1.19 | 2.81  | 2.35  | 1.44  | 1.12  | 2.12  | -2.21  | 2.37  | 2.79  | -1.97  |
| MMP9     | 3.39  | 1.18  | -4.52 | 4.15  | -1.01 | 1.79  | 2.07  | 1.28  | -3.57 | 2.1   | 1.18  | -1.98 | -1.07 | 1.38  | 3.07   | 3.43  | 1.65  | 5.04   |
| MYC      | -1.03 | 1.18  | 1.4   | 1.08  | 1     | 1.19  | -1.28 | 1.01  | -1.26 | 1.25  | 1.12  | -1.54 | 1.06  | 1.12  | -2.13  | -1.89 | 1.24  | -1.37  |
| NFKB1    | 1.26  | 1.24  | 1.16  | 1.25  | 1.16  | 1.71  | 1.01  | 1.13  | 1.09  | -1.31 | 1.86  | 1.06  | 1.1   | 1.55  | -1.11  | 1.27  | 1.74  | -2.14  |
| PDGFA    | 1.07  | 1.28  | 1.28  | 1.31  | 1.26  | 2.01  | 1.08  | -1.11 | 1.08  | 2.65  | 1.35  | 1.52  | 3.44  | 1.33  | 3.73   | 4.18  | 1.44  | 5.68   |
| PDGFB    | 2.33  | 1.06  | 1.04  | 1.07  | 1.04  | 1.32  | 1.35  | -1.13 | 1.13  | 5.3   | 1.18  | 6.26  | 6.12  | 1.38  | 22.93  | 29.46 | 1.65  | 93.8   |
| PLAT     | -1.02 | 1.14  | -1.03 | 1.44  | 1.08  | 1.02  | -1.02 | 1.1   | 1.36  | 2.33  | 1.11  | 1.75  | 2.97  | -1.71 | 1.27   | 2.14  | -1.59 | 1.51   |
| PLAU     | 1.95  | 1.12  | 1.14  | 1.04  | 1.01  | 1.41  | -1.17 | -1.15 | -1.32 | 1.32  | 1.39  | -1.05 | 2.14  | 1.73  | -1.37  | -1.02 | 1.66  | -4.35  |
| PLG      | 1.31  | -1.13 | -1.15 | 2.27  | 1.04  | 3.84  | -1.62 | -2.03 | -1.58 | 2.39  | 1.18  | -1.28 | 2.89  | 2.99  | 1.28   | 1.71  | 1.65  | 8.5    |
| SERPINA1 | 3.99  | 1.06  | 4.86  | -2.63 | -2.85 | -1.61 | 2.67  | -1.22 | 2.15  | 4.53  | 1.58  | 19.77 | 3.64  | -3.71 | 13.27  | 13.67 | -7.33 | 51.25  |
| SERPINE1 | 1.04  | 1.09  | 1.2   | 1.33  | -1.19 | -1.18 | 1.01  | 1.03  | -1.01 | -1.61 | -2.4  | 1.43  | 2.61  | -1.73 | 1.92   | 2.29  | -2.14 | 1.02   |
| SERPINH1 | -1.01 | -1.09 | 1.07  | -1.35 | 1.07  | 1.23  | -1.45 | -1.1  | -1.34 | 1.32  | 1.17  | 1.01  | -1.7  | 1.31  | -3.75  | -2.38 | 1.33  | -2.62  |

|               |             |              |       |             |            |              |              |              |             |              |       |              |              |              |               |              |              |               |
|---------------|-------------|--------------|-------|-------------|------------|--------------|--------------|--------------|-------------|--------------|-------|--------------|--------------|--------------|---------------|--------------|--------------|---------------|
| <i>SMAD2</i>  | -1.39       | 1.14         | 1.01  | -1.01       | 1.07       | 1.29         | 1.03         | -1.16        | -1.15       | -1.43        | -1.1  | -1.18        | -1.34        | 1.34         | -1.12         | 1.2          | 1.21         | -1.07         |
| <i>SMAD3</i>  | 1.08        | -1.08        | -1.17 | -1.01       | 1.21       | 1.06         | -1.35        | 1.01         | -1.14       | -1.14        | -1.77 | -1.01        | 1.8          | <b>-2.27</b> | -1.75         | <b>2.59</b>  | <b>-2.23</b> | <b>-2.21</b>  |
| <i>SMAD4</i>  | -1.07       | -1.3         | -1.09 | 1.11        | 1.16       | 1.56         | 1.1          | 1.15         | 1.07        | -1.64        | 1.03  | -1.08        | 1.07         | 1.09         | -1.32         | -1.4         | -1.02        | -1.67         |
| <i>SMAD6</i>  | 1.11        | -1.18        | -1.24 | -1.38       | -1.1       | -1.88        | -1.04        | 1.31         | 1.14        | 1.17         | 1.58  | -1.69        | 1.3          | 1.56         | <b>-2.24</b>  | -1.18        | 1.6          | <b>-3.23</b>  |
| <i>SMAD7</i>  | 1.28        | 1.4          | 1.44  | -1.13       | 1.21       | 1.13         | -1.15        | -1.01        | -1.29       | <b>-2.21</b> | 1.18  | 1.2          | <b>2.79</b>  | <b>-2.08</b> | 1.32          | <b>2.07</b>  | -1.62        | 1.56          |
| <i>SNAI1</i>  | -1          | 1.57         | 1.87  | -1.07       | -1.03      | 1.46         | -1.08        | -1.12        | -1.2        | -1.69        | 1.08  | <b>2.4</b>   | -1.62        | 1.15         | <b>4.65</b>   | <b>2.15</b>  | -1.04        | <b>4.35</b>   |
| <i>SP1</i>    | -1.04       | -1.06        | -1.09 | 1.72        | 1.69       | <b>2.48</b>  | 1.23         | 1.14         | 1.09        | -1.13        | 1.62  | 1.05         | 1.84         | 1.28         | -1.03         | 1.09         | 1.78         | -1.15         |
| <i>STAT1</i>  | -1.16       | -1.01        | 1.02  | <b>3.04</b> | 1.52       | <b>7.78</b>  | <b>2.96</b>  | -1.09        | <b>3.59</b> | <b>3.05</b>  | 1.46  | <b>4.36</b>  | 1.62         | 1.92         | 1.71          | -1.55        | <b>2.26</b>  | <b>-2.03</b>  |
| <i>STAT6</i>  | 1.21        | -1.37        | 1.02  | 1.16        | 1.07       | 1.72         | -1.18        | 1.01         | 1.07        | 1.06         | 1.21  | 1.48         | 1.7          | -1.22        | -1.52         | -1.1         | -1.65        | <b>-3.62</b>  |
| <i>TGFB1</i>  | 1.06        | -1.09        | 1.15  | -1          | 1.28       | 1.41         | -1.06        | -1.12        | 1.02        | -1.48        | -1.08 | 1.46         | 1.13         | <b>-2.05</b> | <b>2.22</b>   | <b>2.46</b>  | -1.67        | <b>2.64</b>   |
| <i>TGFB2</i>  | 1.06        | -1.22        | -1.07 | -1.97       | 1.26       | -1.27        | <b>-2.04</b> | 1.05         | -1.97       | <b>2.92</b>  | 1.43  | <b>-2.15</b> | <b>3.99</b>  | <b>3.15</b>  | <b>-3.43</b>  | -1.18        | <b>2.36</b>  | -1.45         |
| <i>TGFB3</i>  | 1.16        | 1.27         | -1.07 | 1.89        | -1.25      | <b>2.54</b>  | 1.32         | -1.32        | 1.45        | <b>2.04</b>  | -1.15 | 1.51         | 1.9          | -1.04        | 1.03          | 1.29         | 1.14         | -1.49         |
| <i>TGFBR1</i> | 1.03        | -1.11        | -1.13 | 1.07        | -1.01      | 1.07         | 1.27         | -1.14        | 1.09        | <b>-2.04</b> | 1.74  | 1.04         | 1.46         | <b>2.23</b>  | -1.26         | -1.31        | <b>2.71</b>  | -1.2          |
| <i>TGFBR2</i> | -1.54       | 1.14         | 1.08  | -1.01       | 1.24       | 1.38         | 1.03         | 1.03         | -1          | 1.79         | 1.59  | -1.04        | <b>2.84</b>  | 1.58         | -1.61         | 1.05         | 1.74         | <b>-4.64</b>  |
| <i>TGIF1</i>  | 1.48        | -1.13        | -1.11 | -1.16       | 1.08       | 1.4          | -1.3         | -1.05        | -1.24       | 1.92         | 1.45  | -1.08        | 1.61         | 1.34         | -1.08         | -1.27        | 1.63         | -1.06         |
| <i>THBS1</i>  | 1.45        | 1            | 1.08  | -1.12       | 1.02       | 1.24         | -1.3         | -1.05        | -1.54       | 1.39         | -1.52 | -1.53        | <b>2.41</b>  | -1.71        | -1.64         | <b>2.09</b>  | -1.96        | <b>-4.89</b>  |
| <i>THBS2</i>  | 1.05        | 1.01         | 1.1   | -1.5        | 1.51       | 1.49         | -1.97        | 1.02         | -1.9        | <b>-2.94</b> | 1.81  | -1.77        | 1.42         | 1.2          | <b>-11.43</b> | <b>-3.87</b> | 1.37         | <b>-47.91</b> |
| <i>TIMP1</i>  | 1.44        | -1.26        | 1.13  | -1.38       | 1.11       | 1.07         | -1.35        | 1.11         | -1.34       | <b>2.03</b>  | -1.47 | -1.1         | <b>2.3</b>   | 1.56         | 1.06          | -1.14        | 1.11         | -1.49         |
| <i>TIMP2</i>  | 1.52        | -1.31        | 1.11  | 1.06        | 1.4        | 1.51         | -1.18        | 1.2          | -1.04       | <b>-2.86</b> | 1.59  | 1.14         | <b>2.35</b>  | -1.08        | -1.86         | -1.04        | 1.01         | <b>-5.41</b>  |
| <i>TIMP3</i>  | 1.08        | -1.17        | 1.05  | -1.39       | 1.05       | -1.24        | -1.61        | -1.07        | -1.97       | <b>-2.67</b> | 1.01  | -1.91        | <b>-2.19</b> | 1.41         | <b>-6.69</b>  | <b>-3.86</b> | <b>2.67</b>  | <b>-16.67</b> |
| <i>TIMP4</i>  | -1.24       | 1.06         | 1.22  | -1.07       | -1.48      | 1.19         | 1.27         | -1.12        | 1.59        | <b>2.98</b>  | -1.75 | 1.58         | 1.78         | -1.94        | <b>2.1</b>    | 1.32         | <b>-2.73</b> | <b>4.23</b>   |
| <i>TNF</i>    | <b>3.37</b> | <b>-2.99</b> | 1.2   | 1.07        | <b>9.1</b> | <b>23.21</b> | -1.11        | <b>-2.46</b> | 1.39        | <b>3.6</b>   | 1.18  | -1.28        | <b>10.56</b> | <b>5.19</b>  | <b>26.54</b>  | <b>34.21</b> | <b>27.92</b> | <b>2.96</b>   |
| <i>VEGFA</i>  | 1.48        | 1.26         | 1.68  | 1.03        | 1.02       | <b>2.07</b>  | 1.54         | -1.22        | 1.1         | <b>2.74</b>  | 1.03  | -1.05        | 1.04         | 1.13         | 1.71          | 1.04         | 1.59         | <b>2.62</b>   |

(\*) Results are expressed as mean values of fold-change observed in single- or double-infected cells, compared to uninfected control cells. All values exceeding +2 or -2 folds are indicated in bold. Orange boxes indicate >3 up-regulated factors. Blue boxes indicate <-3 down-regulated factors.
