# Supplementary material for: Human Cytomegalovirus and Human Herpesvirus 6 Coinfection of Dermal Fibroblasts Enhances the Pro-Inflammatory Pathway Predisposing to Fibrosis: The Possible Impact on Systemic Sclerosis
Source: MDPI journal article supplement (doi:10.3390/microorganisms10081600), 2022-08-08
Supplement: s1 [file s1]

Table S2. Fold-change values of apoptosis-associated factors after single or double infection with HCMV and HHV-6A.

| Factor         | Fold-change expression of analyzed factors (*) |             |                 |             |              |                 |             |              |                 |              |              |                 |              |              |                 |              |              |                 |
|----------------|------------------------------------------------|-------------|-----------------|-------------|--------------|-----------------|-------------|--------------|-----------------|--------------|--------------|-----------------|--------------|--------------|-----------------|--------------|--------------|-----------------|
|                | 0 d.p.i.                                       |             |                 | 1 d.p.i.    |              |                 | 2 d.p.i.    |              |                 | 4 d.p.i.     |              |                 | 7 d.p.i.     |              |                 | 10 d.p.i.    |              |                 |
|                | HCMV                                           | HHV-6A      | HCMV/<br>HHV-6A | HCMV        | HHV-6A       | HCMV/<br>HHV-6A | HCMV        | HHV-6A       | HCMV/<br>HHV-6A | HCMV         | HHV-6A       | HCMV/<br>HHV-6A | HCMV         | HHV-6A       | HCMV/<br>HHV-6A | HCMV         | HHV-6A       | HCMV/<br>HHV-6A |
| <i>ABL1</i>    | 1.15                                           | -1.12       | 1.27            | -1.08       | 1.3          | 1.62            | -1.19       | 1.21         | -1.13           | 1.13         | 1.03         | -1.05           | -1.01        | -1.34        | -1.9            | 1.3          | 1.01         | <b>-2.67</b>    |
| <i>AIFM1</i>   | -1.04                                          | -1.19       | -1.06           | 1.28        | 1.12         | 1.43            | 1.34        | -1.05        | 1.43            | <b>-2.16</b> | 1.29         | 1.31            | <b>2.03</b>  | -1.35        | 1.39            | <b>2.48</b>  | -1.09        | <b>2.06</b>     |
| <i>AKT1</i>    | 1.02                                           | 1.04        | 1.11            | 1.26        | 1.04         | 1.34            | 1.07        | 1.13         | 1.35            | -1.54        | -1.07        | 1.15            | 1.72         | -1.28        | 1.36            | 1.02         | 1.12         | 1.18            |
| <i>APAF1</i>   | 1.07                                           | 1.47        | 1.3             | 1.4         | 1.16         | 1.1             | 1.06        | 1.09         | 1.04            | <b>-2.13</b> | 1.46         | -1.16           | <b>2.27</b>  | -1.32        | 1.33            | <b>2.39</b>  | -1.08        | 1.33            |
| <i>BAD</i>     | 1.01                                           | 1.03        | 1.05            | -1.01       | 1.02         | 1.19            | 1.01        | -1.07        | -1.02           | 1.55         | -1.15        | -1.02           | <b>2.52</b>  | -1.86        | -1.07           | 1.97         | -1.24        | 1.08            |
| <i>BAG1</i>    | 1.16                                           | -1.2        | -1.17           | 1.62        | 1.85         | <b>4.43</b>     | 1.56        | 1.31         | 1.33            | 1.71         | -1.54        | 1.79            | 1.97         | -1.75        | <b>2.59</b>     | 1.99         | -1.19        | -1.92           |
| <i>BAG3</i>    | 1.22                                           | 1.06        | 1.31            | <b>2.24</b> | 1.24         | 1.68            | -1.01       | -1.02        | 1.18            | 1.83         | -1.14        | 1.5             | 1.98         | -1.73        | 1.96            | <b>2.38</b>  | -1.23        | <b>3.15</b>     |
| <i>BAK1</i>    | 1.05                                           | 1.09        | 1.22            | 1.45        | -1.01        | 1.84            | 1.72        | 1.22         | 1.65            | -1.23        | 1.01         | 1.27            | <b>2.17</b>  | -1.5         | <b>3.33</b>     | 1.1          | -1.15        | <b>2.35</b>     |
| <i>BAX</i>     | -1.18                                          | -1.11       | 1.1             | 1.23        | 1.18         | 1.33            | 1.02        | -1.04        | 1.26            | -1.56        | -1.01        | 1.19            | 1.37         | -1.08        | -1.04           | -1.4         | 1.06         | -1.8            |
| <i>BCL10</i>   | 1.03                                           | 1           | -1.16           | 1.42        | 1.06         | 1.32            | 1.03        | -1.11        | -1.01           | <b>-2.82</b> | 1.13         | -1.15           | 1.94         | -1.66        | 1.12            | -1.72        | -1.05        | -1.05           |
| <i>BCL2</i>    | 1.97                                           | 1.26        | 1.33            | 1.08        | 1.15         | 1.71            | -1.49       | -1.09        | -1.47           | <b>2.29</b>  | <b>2.31</b>  | -1.41           | <b>3.89</b>  | <b>5.42</b>  | <b>-2.04</b>    | 1.35         | 1.18         | -1.37           |
| <i>BCL2A1</i>  | -1.26                                          | 1.77        | <b>4.87</b>     | -1.36       | -1.51        | <b>7.18</b>     | -1.43       | <b>-2.71</b> | <b>-3.49</b>    | -1.89        | -1.1         | <b>14.66</b>    | <b>2.92</b>  | <b>-2.73</b> | <b>3.99</b>     | 1.33         | <b>-2.01</b> | -1.08           |
| <i>BCL2L1</i>  | -1.39                                          | -1.07       | 1.12            | 1.12        | 1.02         | 1.14            | -1.13       | 1.01         | -1.11           | -1.22        | <b>-2.35</b> | -1.2            | <b>2.78</b>  | <b>-2.1</b>  | -1.16           | <b>2.89</b>  | -1.31        | <b>-2.64</b>    |
| <i>BCL2L10</i> | 1.05                                           | 1.44        | 1               | 1.16        | 1.02         | 1.39            | <b>3.6</b>  | -1.03        | <b>2.1</b>      | 1.34         | 1.87         | 1.04            | <b>2.95</b>  | -1.13        | <b>4.42</b>     | <b>2.69</b>  | 1.48         | <b>4.76</b>     |
| <i>BCL2L11</i> | 1.52                                           | 1.35        | 1.17            | 1.54        | 1.08         | <b>3.35</b>     | <b>2.59</b> | 1.16         | 1.51            | -1.6         | -1.23        | -1.62           | 1.43         | <b>-2.28</b> | 1.08            | -1.11        | -1.84        | -1.05           |
| <i>BCL2L2</i>  | -1.02                                          | 1.89        | 1.77            | 1.51        | 1.29         | <b>2.16</b>     | 1.25        | 1.06         | 1.32            | -1.06        | -1.14        | 1.12            | 1.93         | -1.61        | 1.31            | 1.17         | -1.2         | -1.11           |
| <i>BFAR</i>    | 1.1                                            | 1.27        | 1.39            | 1.08        | 1.07         | 1.45            | 1.06        | -1.18        | -1.07           | 1.33         | -1.32        | -1.07           | 1.72         | -1.76        | -1.12           | 1.92         | -1.1         | -1.31           |
| <i>BID</i>     | 1.06                                           | 1.12        | 1.32            | 1.38        | 1.05         | <b>2.16</b>     | -1.01       | -1.06        | 1.21            | <b>-2.23</b> | 1.02         | <b>2.93</b>     | <b>3.26</b>  | <b>-2.44</b> | <b>7.02</b>     | <b>5.1</b>   | 1.7          | <b>6.43</b>     |
| <i>BIK</i>     | 1.06                                           | <b>2.18</b> | <b>4.87</b>     | 1.74        | <b>-2.38</b> | <b>2.25</b>     | <b>2.86</b> | <b>-2.44</b> | <b>2.27</b>     | -1.17        | -1.31        | <b>81.8</b>     | 1.02         | -1.03        | <b>76.28</b>    | <b>-2.49</b> | 1.35         | <b>113.46</b>   |
| <i>BIRC2</i>   | 1.01                                           | 1.08        | 1.37            | 1.14        | 1.01         | 1.77            | -1.17       | -1.05        | -1.02           | <b>-2.13</b> | 1.9          | -1.19           | 1.38         | <b>2.24</b>  | -1.27           | <b>-2.46</b> | <b>2.97</b>  | -1.9            |
| <i>BIRC3</i>   | 1.43                                           | 1.19        | 1.82            | 1.48        | 1.02         | <b>3.57</b>     | -1.87       | -1.11        | -1.59           | <b>-3.05</b> | 1.83         | 1.95            | <b>-3.45</b> | <b>-5.78</b> | <b>4.39</b>     | <b>2.64</b>  | <b>2.82</b>  | -1.28           |
| <i>BIRC5</i>   | -1.3                                           | -1.38       | -1.2            | 1.35        | 1.15         | <b>-2.26</b>    | <b>2.35</b> | -1.02        | <b>2.4</b>      | -1.63        | -1.02        | <b>23.72</b>    | 1.17         | 1.8          | <b>2.83</b>     | -1.95        | <b>2.48</b>  | <b>3.01</b>     |
| <i>BIRC6</i>   | -1.21                                          | 1.01        | 1.09            | 1.22        | 1.04         | 1.15            | 1.05        | -1.06        | -1.18           | -1.98        | 1.11         | -1.3            | -1.1         | 1.31         | 1.1             | <b>-2.8</b>  | 1.99         | 1.11            |
| <i>BNIP2</i>   | -1.38                                          | 1.13        | 1.1             | 1.17        | -1.05        | 1.38            | 1.15        | -1.06        | 1               | -1.16        | -1.07        | -1.04           | 1.21         | -1.16        | -1.17           | -1.24        | 1.19         | -1.24           |
| <i>BNIP3</i>   | -1.17                                          | 1.09        | 1.09            | 1.06        | 1.02         | 1.26            | -1.09       | -1.26        | -1.04           | -1.85        | 1.33         | -1.07           | 1.31         | 1.11         | 1.06            | <b>-2.71</b> | 1.61         | 1.02            |
| <i>BNIP3L</i>  | -1.14                                          | 1.16        | 1.1             | 1.01        | 1.05         | 1.44            | -1.13       | -1.03        | -1.32           | <b>-2.15</b> | -1.03        | -1.48           | -1.41        | 1.15         | <b>-2.51</b>    | -1.32        | 1.29         | <b>-2.74</b>    |
| <i>BRAF</i>    | -1.33                                          | 1.11        | 1.15            | -1.15       | -1.03        | 1.28            | -1.07       | 1.02         | 1.44            | <b>2.13</b>  | 1.04         | 1.54            | 1.26         | 1.07         | 1.87            | <b>-2.52</b> | 1.6          | 1.05            |
| <i>CASP1</i>   | 1.27                                           | -1          | 1.01            | <b>3.63</b> | 1.27         | <b>7.88</b>     | <b>2.35</b> | -1.11        | <b>2.46</b>     | 1.41         | 1.13         | <b>2.74</b>     | <b>2.83</b>  | 1.06         | 1.24            | <b>-4.38</b> | 1.17         | <b>-49.92</b>   |

|         |       |       |       |       |       |       |       |       |       |       |       |       |       |       |       |       |       |       |
|---------|-------|-------|-------|-------|-------|-------|-------|-------|-------|-------|-------|-------|-------|-------|-------|-------|-------|-------|
| CASP10  | 1.06  | -1.25 | -1.01 | 1.41  | 1.1   | 2.45  | 1.53  | -1.16 | 1.46  | 1.22  | -1.17 | 1.39  | 1.67  | -1.28 | 1.01  | 2.93  | 1.18  | -2.16 |
| CASP14  | 1.11  | -1.03 | 2.04  | 1.91  | 1.82  | 3.95  | 1.64  | -1.01 | 1.23  | -1.24 | 1.03  | 2.84  | 2.25  | -1.54 | -1.16 | 2.17  | -1.28 | -1.11 |
| CASP2   | -1.24 | -1.02 | 1.07  | 1.83  | 1.14  | 1.61  | 1.68  | -1.14 | 1.64  | -1.3  | 1.15  | 1.22  | 1.88  | -1.33 | 1.82  | -1.26 | 1.28  | 1.81  |
| CASP3   | -1.2  | 1.01  | 1.15  | 1.18  | -1.12 | 1.52  | 1.35  | 1.21  | 1.39  | 1.78  | -1.09 | -1.06 | 2.05  | 1.1   | 2.71  | -2.31 | 1.61  | -1.14 |
| CASP4   | -2.83 | 1.02  | 1.11  | 1.53  | 1.03  | 2.2   | 1.15  | -1.16 | 1.17  | 2.09  | 2.44  | 1.28  | 1.53  | 2.05  | 1.18  | -2.59 | 1.18  | -1.55 |
| CASP5   | -1.01 | -1.91 | -4.81 | -1.42 | -2.55 | -3.67 | 1.07  | -1.02 | 1.14  | 1.03  | 1.16  | -1.15 | 1.63  | -1.43 | 2.97  | -2.11 | 1.05  | 1.37  |
| CASP6   | 1.18  | 1.12  | 1.03  | 1.4   | 1.02  | 1.37  | 1.49  | 1.1   | 1.39  | -1.55 | 1.37  | -1    | 2.45  | -1.1  | -1.06 | -2.02 | 1.1   | -1.47 |
| CASP7   | -1.58 | 1.01  | 1.07  | 2.23  | 1.47  | 2.86  | 1.29  | -1.08 | 1.22  | 2.28  | -1.1  | 1.47  | 2.01  | -1.1  | 1.07  | -1.74 | 1.29  | -2.13 |
| CASP8   | 1.49  | -1.06 | 1.01  | 1.58  | 1.01  | 2.11  | 1.31  | -1.05 | 1.79  | 1.6   | -1.49 | 1.04  | 1.47  | -2.42 | -1.14 | -1.2  | -1.49 | -2.46 |
| CASP9   | -2.62 | -1.05 | 1.05  | -1.03 | 1.01  | 1.26  | 1.02  | -1.04 | 1.19  | -1.11 | 2.25  | 1.18  | 2.1   | -2.53 | -1.24 | -1.12 | 5.13  | -1.24 |
| CD27    | 1.31  | -1.21 | -1.75 | 3.68  | 3.47  | 3.84  | 1.58  | 2.29  | 5.09  | 3.58  | -1.07 | -1.6  | 14.42 | -2.56 | 6.25  | 7.06  | -2.53 | -4.05 |
| CD40    | 1.06  | -1.5  | -1.21 | 1.38  | 1.2   | 3     | 1.05  | -1.02 | 1.22  | -1.22 | -1.17 | 1.71  | -1.38 | -1.28 | 4.38  | 2.22  | 2.09  | 2.55  |
| CD40LG  | 1.87  | 1.23  | 2.06  | 1.31  | 1.6   | 2.1   | 1.1   | -1.17 | 1.13  | 1.39  | -1.14 | 1.24  | 1.93  | -2.52 | -2.01 | 1.85  | -1.23 | 1.59  |
| CD70    | 1     | -1.18 | 1.5   | 1.2   | 1.74  | 2.72  | 1.41  | 1.34  | 1.21  | 1.78  | 1.12  | 1.69  | 2.37  | -1.04 | 1.71  | -2.04 | 1.52  | 1.1   |
| CFLAR   | 1.12  | 1.15  | 1.05  | 1.46  | 1.19  | 2.4   | 1.03  | -1.05 | 1.01  | 1.22  | 2.81  | -1.19 | 1.46  | -2.51 | -1.28 | 1.52  | -2.95 | -3.85 |
| CIDEA   | -1.02 | -2.82 | 1.25  | -1.02 | -2.71 | -1.29 | 1.45  | -2.69 | 1.36  | -1.04 | -1.16 | 2.68  | 2.4   | -1.83 | -1.94 | 2.08  | -1.26 | 1.08  |
| CIDEB   | 1     | -1.06 | 1.1   | 1.45  | 1.11  | 1.53  | 1.09  | -1.27 | 1.08  | -1.22 | -1.2  | 1.16  | 2.15  | -1.79 | 1.64  | 1.12  | -1.43 | 2.66  |
| CRADD   | -1.42 | 1.13  | 1.1   | -1.03 | -1.17 | -1.1  | 1.37  | -1.01 | 1.05  | -1.25 | 1.19  | -1.29 | 2.1   | 1.51  | 1.06  | 1.72  | 1.51  | 2.19  |
| CYCS    | 1.17  | -1.92 | -1.32 | 2.1   | 1.16  | 1.72  | 1.03  | -1.8  | 1.11  | 2.01  | 1.03  | 1.16  | 3.61  | -1.99 | -1.76 | 2.84  | 1.35  | -1.14 |
| DAPK1   | 1.01  | 1.58  | 1.15  | 1.02  | 1.42  | 2.18  | -1.11 | -1.08 | -1.37 | 1.43  | -1.33 | -1.09 | 2.72  | -1.78 | 1.07  | 1.19  | -1.47 | 2.25  |
| DFFA    | -1.08 | 1.17  | 1.12  | 1.35  | 1.08  | 1.36  | 1.1   | -1.21 | 1.07  | 2.07  | 1.26  | 1.21  | 2.87  | -2.13 | 1.54  | 2.02  | -1.51 | 1.78  |
| DIABLO  | -1.01 | -1    | -1.17 | -1.21 | -1.2  | 1.04  | 1.07  | -1.03 | 1.12  | 2.88  | 1.29  | -1.1  | 2.11  | -2.03 | 1.27  | 2.64  | -1.4  | 1.61  |
| FADD    | 1.25  | 1.09  | 1.15  | 1.34  | 1.11  | 1.53  | 1.29  | -1.03 | 1.29  | 1.82  | 1.24  | 1.24  | 1.57  | 1.43  | 1.9   | -2.89 | 2.36  | 1.35  |
| FAS     | 1.06  | 1.15  | 1.13  | 1.34  | 1.02  | 1.78  | 1.12  | 1.03  | 1.09  | 1.22  | 1.01  | 1.05  | 1.67  | -1.28 | -1.12 | 2.93  | 3.7   | -3.35 |
| FASLG   | 1.19  | -1.87 | -1.26 | 1.33  | 1.67  | 2.33  | 1.76  | -1.32 | 2.32  | -1.74 | 1.74  | 1.21  | 2.92  | -1.3  | -2.15 | -1.84 | 1.15  | 1.82  |
| GADD45A | -1.1  | -1.24 | -1.13 | 1.05  | 1.05  | 1.36  | 1.26  | -1.03 | 1.18  | 1.33  | 1.07  | -1.16 | -1.23 | -2.34 | -1.34 | 1.33  | -1.21 | 1.01  |
| HRK     | -1.12 | 1.09  | -2.64 | -1.73 | 1.36  | 3.95  | 1.1   | -1.01 | -1.16 | 2.08  | 1.3   | 2.05  | 2.38  | -1.42 | 2.52  | -1.22 | -1.05 | 2.85  |
| IGF1R   | 1.06  | 1.03  | 1.06  | -1.02 | 1.07  | 2.27  | -1.19 | -1.43 | -1.35 | 1.22  | -1.17 | -1.3  | 1.67  | -1.28 | -2.18 | -3.65 | 1.18  | -2.05 |
| IL10    | 2.41  | -1.7  | -3.63 | 2.32  | -1.16 | 2.51  | -1.18 | -2.16 | -1.11 | 1.22  | -1.17 | 2.58  | 2.88  | 1.4   | -1.77 | 2.21  | 1.18  | 1.16  |
| LTA     | 1.06  | -1.03 | -1.65 | 1.54  | 2.48  | 2.14  | 1.06  | 1.21  | 1.8   | -1.22 | 1.03  | -1.02 | 2.05  | -1.19 | -2.23 | 1.82  | 1.04  | -1.48 |
| LTBR    | 1.02  | 1.18  | 1.23  | 1.31  | 1.53  | 2.49  | -1.36 | -1.09 | -1.12 | 1.44  | -1.22 | 1.33  | 1.48  | -1.05 | 1.43  | -2.59 | 1.49  | -1.04 |
| MCL1    | 1.19  | -1.08 | 1.07  | 1.02  | 1.07  | 1.63  | -1.06 | -1.12 | -1.03 | 3.37  | -1.2  | -1.17 | 2.35  | -1.05 | -1.57 | 1.39  | 1.42  | -2.84 |
| NAIP    | 1.59  | 1.59  | -1.56 | -1.28 | 1.3   | -1.09 | 1.07  | -1.49 | 1.18  | -1.36 | 1.32  | -1.56 | 2.44  | -1.26 | -1.97 | -1.18 | 1.05  | 1.03  |

|                  |              |             |              |             |              |             |             |              |              |              |               |              |              |               |              |              |               |               |
|------------------|--------------|-------------|--------------|-------------|--------------|-------------|-------------|--------------|--------------|--------------|---------------|--------------|--------------|---------------|--------------|--------------|---------------|---------------|
| <i>NFKB1</i>     | -1.14        | 1.21        | 1.41         | 1.33        | 1.08         | 1.78        | -1.02       | 1.05         | 1.02         | <b>2.21</b>  | 1.42          | -1.22        | <b>2.96</b>  | -1.28         | -1.34        | 1.64         | 1.06          | <b>-2.89</b>  |
| <i>NOD1</i>      | 1.01         | -1.22       | -1.2         | <b>2.39</b> | 1.1          | <b>3.57</b> | 1.66        | -1.14        | 1.5          | 1.73         | -1.12         | <b>2.09</b>  | <b>2.39</b>  | <b>-2.42</b>  | <b>2.63</b>  | 1.87         | -1.56         | 1.73          |
| <i>NOL3</i>      | 1.05         | 1.09        | 1.27         | 1.43        | 1.22         | 1.66        | 1.08        | -1.09        | 1.03         | -1.31        | -1.89         | 1.24         | -1.14        | <b>-2.83</b>  | -1.75        | <b>-2.39</b> | <b>-2.41</b>  | <b>-2.52</b>  |
| <i>PYCARD</i>    | 1.18         | 1.07        | 1.08         | 1.35        | -1.02        | <b>2.17</b> | -1.05       | -1.02        | 1.09         | 1.16         | -1.02         | -1.38        | 1.02         | -1.09         | <b>-3.62</b> | -1.41        | 1.13          | <b>-7.53</b>  |
| <i>RIPK2</i>     | <b>2.88</b>  | 1.12        | 1.15         | 1.25        | 1.17         | <b>2.31</b> | -1.06       | -1.19        | 1.1          | <b>6.79</b>  | -1.17         | 1.13         | <b>4.64</b>  | <b>3.91</b>   | <b>2.08</b>  | <b>2.53</b>  | 1.18          | 1.87          |
| <i>TNF</i>       | 1.48         | 1.28        | -1.02        | 1.11        | 1.07         | <b>5.97</b> | <b>4.96</b> | -1.02        | <b>15.21</b> | <b>-2.83</b> | -1.02         | -1.15        | <b>3.33</b>  | -1.55         | <b>23.35</b> | <b>2.36</b>  | -1.54         | <b>4.27</b>   |
| <i>TNFRSF10A</i> | 1.43         | 1.06        | 1.11         | <b>2.11</b> | 1.16         | <b>3.43</b> | 1.94        | -1.18        | 1.39         | -1.17        | 1.47          | <b>2.38</b>  | <b>3.24</b>  | -1.55         | <b>7.82</b>  | -1.28        | 1.34          | <b>5.06</b>   |
| <i>TNFRSF10B</i> | 1.24         | -1.03       | -1.04        | 1.21        | -1.04        | 1.71        | 1.13        | -1.09        | 1.11         | -1.82        | -1.44         | -1.28        | 1.24         | 1.31          | 1            | <b>-2.47</b> | 1.96          | -1.35         |
| <i>TNFRSF11B</i> | 1.31         | -1.16       | 1.03         | -1.29       | -1.09        | 1.06        | -1.36       | -1.06        | -1.47        | 1.11         | 1.27          | -1.05        | <b>2.25</b>  | -1.8          | -1.19        | <b>2.21</b>  | -1.38         | <b>-2.69</b>  |
| <i>TNFRSF1A</i>  | 1.38         | 1.17        | 1.37         | -1.16       | 1.14         | 1.27        | -1.09       | 1.04         | -1.02        | -1.05        | -1.02         | 1.02         | <b>2.21</b>  | <b>-2.6</b>   | -1.29        | <b>2.27</b>  | -1.17         | -1.91         |
| <i>TNFRSF1B</i>  | 1.05         | -1.06       | -1.06        | 1.11        | <b>-2.7</b>  | 1.23        | 1.18        | -1.05        | 1.01         | 1.58         | 1.36          | <b>2.05</b>  | 1.58         | -1.2          | <b>6.03</b>  | <b>-2.71</b> | 1.23          | <b>3.36</b>   |
| <i>TNFRSF21</i>  | <b>2.3</b>   | -1.05       | 1.04         | -1.03       | 1.12         | 1.65        | -1.08       | 1.04         | 1.07         | 1.75         | -1.12         | -1.16        | <b>2.14</b>  | <b>-2.39</b>  | <b>-3.17</b> | 1.97         | -1.56         | <b>-2.59</b>  |
| <i>TNFRSF25</i>  | <b>2.02</b>  | <b>2.84</b> | <b>2.34</b>  | 1.11        | <b>-7.21</b> | -1.18       | -1.01       | -1.65        | 1.15         | <b>2.9</b>   | <b>-14.34</b> | <b>-4.58</b> | <b>16.48</b> | <b>-15.68</b> | 1.43         | <b>14.29</b> | <b>-10.37</b> | <b>-2.03</b>  |
| <i>TNFRSF9</i>   | 1.71         | -1.5        | -1.25        | 1.23        | <b>2.5</b>   | <b>8.66</b> | 1.2         | -1.46        | <b>5.7</b>   | <b>5.17</b>  | <b>2.03</b>   | -1.06        | <b>4.73</b>  | <b>2.34</b>   | <b>8.78</b>  | <b>-2.43</b> | <b>2.19</b>   | <b>5.57</b>   |
| <i>TNFSF10</i>   | <b>-2.15</b> | 1.25        | -1.12        | <b>8.19</b> | -1.05        | <b>58.8</b> | <b>4.22</b> | -1.04        | <b>7.77</b>  | <b>2.24</b>  | -1.51         | <b>5.13</b>  | 1.67         | <b>-2.39</b>  | <b>6.94</b>  | <b>2.93</b>  | <b>2.25</b>   | <b>-11.46</b> |
| <i>TNFSF8</i>    | 1.13         | 1.37        | -1.49        | -1.9        | <b>-3.43</b> | 1.91        | 1.42        | <b>-2.91</b> | -1.12        | -1.3         | 1.16          | -1.08        | <b>2.03</b>  | -1.75         | -1.63        | 1.51         | -1.03         | <b>2.68</b>   |
| <i>TP53</i>      | 1.1          | -1.15       | 1.09         | 1.31        | 1.14         | 1.54        | 1.12        | -1.11        | 1.01         | -1.4         | 1.19          | 1.13         | 1.64         | -1.14         | -1.25        | 1.02         | 1.49          | -1.22         |
| <i>TP53BP2</i>   | <b>2.73</b>  | 1.34        | 1.51         | 1.13        | -1.15        | 1.63        | 1.08        | -1.03        | -1.17        | 1.22         | 1.85          | 1.07         | <b>-2.05</b> | 1.55          | <b>2.07</b>  | <b>2.11</b>  | 1.34          | <b>2.26</b>   |
| <i>TP73</i>      | 1.43         | -1.09       | <b>-2.14</b> | 1.17        | 1.38         | <b>2.07</b> | 1.24        | -1.14        | 1.3          | <b>-2.04</b> | <b>2.13</b>   | 1.32         | <b>2.17</b>  | -1.58         | -1.13        | <b>2.59</b>  | -1.4          | <b>4.86</b>   |
| <i>TRADD</i>     | 1.29         | -1.66       | -1.22        | 1.17        | -1.35        | 1.76        | 1.08        | 1.19         | 1.02         | 1.14         | 1.22          | 1.18         | <b>2.37</b>  | -1.9          | 1.45         | <b>2.23</b>  | -1.08         | 1.54          |
| <i>TRAF2</i>     | 1.42         | 1.04        | 1.15         | 1.55        | 1.09         | 1.46        | 1.21        | 1.11         | 1.23         | -1.45        | 1.12          | 1.74         | <b>2.16</b>  | -1.39         | <b>2.49</b>  | 1.75         | 1.14          | <b>2.34</b>   |
| <i>TRAF3</i>     | -1.19        | 1.01        | 1.09         | 1.29        | 1.2          | 1.48        | 1.11        | 1.08         | 1.3          | -1.28        | -1.13         | 1.02         | 1.9          | -1.28         | 1.73         | <b>-2.13</b> | 1.05          | 1.09          |
| <i>XIAP</i>      | 1.23         | 1           | 1.1          | 1.07        | -1.02        | 1.6         | 1.26        | -1.02        | 1.07         | -1.85        | <b>-2.14</b>  | 1.22         | <b>2.28</b>  | <b>-2.26</b>  | -1.8         | 1.48         | <b>-2.43</b>  | <b>-2.67</b>  |

(\*) Results are expressed as mean values of fold-change observed in single- or double-infected cells, compared to uninfected control cells. All values exceeding +2 or -2 folds are indicated in bold. Orange boxes indicate >3 up-regulated factors. Blue boxes indicate <-3 down-regulated factors.
